# Supplementary material for: Epigenomic profiling of archived FFPE tissues by enhanced PAT-ChIP (EPAT-ChIP) technology
Source: PubMed Central journal article supplement (PMC6240272; doi:10.1186/s13148-018-0576-y), 2018-11-16
Supplement: 13148_2018_576_MOESM4_ESM.pdf [file 13148_2018_576_MOESM4_ESM.pdf]

## Figure S4

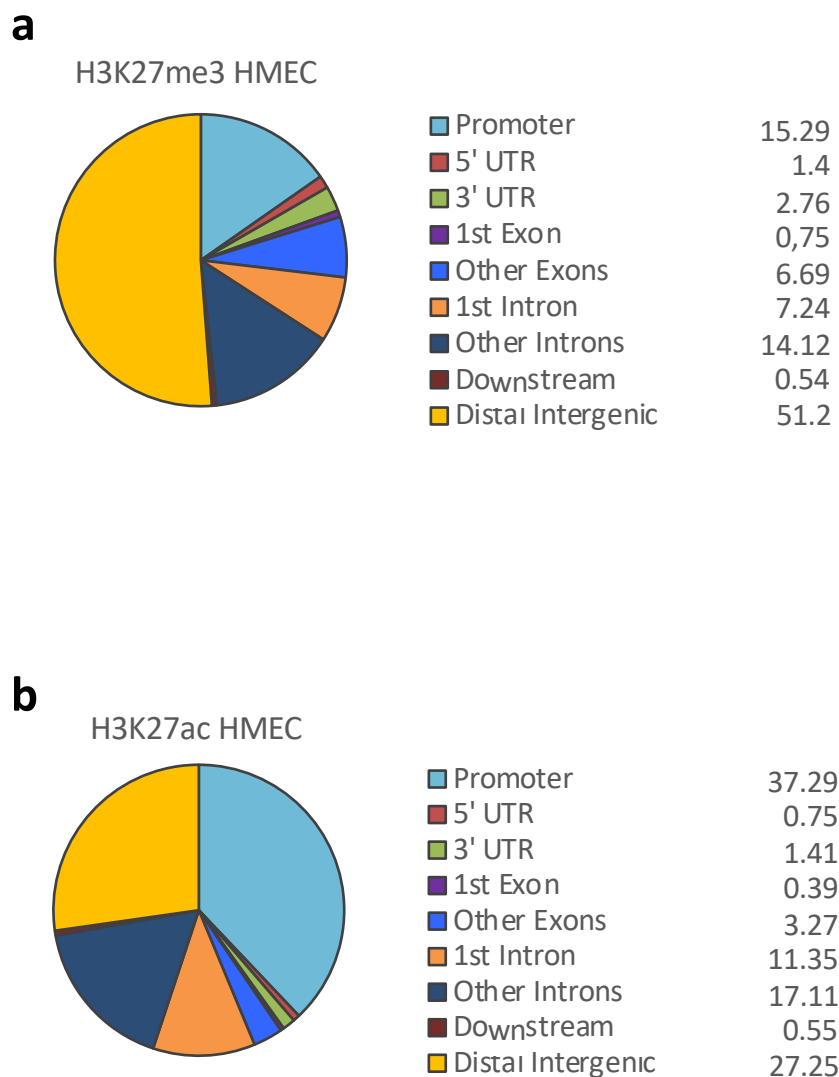

**Figure S4. Analysis of H3K27me3 and H3K27ac ChIP-Seq data from ENCODE project.** H3K27me3 (a) and H3K27ac (b) data set from human mammary epidermal cells (HMEC) was taken from UCSC Genome Browser and analyzed following the same pipeline used for Std PAT-ChIP and EPAT-ChIP (LRC) data sets. Pie charts depicting the distribution of peaks across genomic features with relative percentage values shown on the right. Promoters are defined as -3 Kb to +3 Kb relative to the TSS while Downstream as -3 Kb relative to the end of 3' UTR region.
